# Supplementary material
Source: Research Square preprint supplement (doi:10.21203/rs.3.rs-10189255/v1)
Supplement: Supplementary file 1 [file d9b29e02e0c7a34500b9351e.docx]

**Supplementary Fig. S1: Animal-wise effects of H2O2 on contraction kinetics - exposed/control ratios and Animal-3 normalization (single cellular contraction cycles)**

**Panel A:** For each animal (A1-A4), bars show the mean H2O2-exposed/untreated control ratio of the overall peak time (O, black columns) and its components contraction (C, contraction share, grey columns) and relaxation time (R, relaxation share, white columns) at thresholds of Thr10%, 20%, 50%, and 90%. By definition, O=C+R. **Panel B:** To illustrate between-animal variability, values are additionally expressed as percentages normalized to the control group of Animal 3 (arbitrarily defined as 100%) for each parameter and threshold, shown separately for control and H2O2-exposed cells (single contraction cycles).

**Supplementary Fig. S2: Animal-wise effects of H2O2 on contraction kinetics: exposed/control ratios and Animal-3 normalization (single cellular contraction cycles averaged over the corresponding cells, averaged over the corresponding animals)**

**Panel A:** For each animal (A1-A4), bars show the mean H2O2-exposed/untreated control ratio of the overall peak time (O, black columns) and its components contraction (C, contraction share, grey columns) and relaxation time (R, relaxation share, white columns) at thresholds of Thr10%, 20%, 50%, and 90%. By definition, O=C+R. **Panel B:** To illustrate between-animal variability, values are additionally expressed as percentages normalized to the control group of Animal 3 (arbitrarily defined as 100%) for each parameter and threshold, shown separately for control and H2O2-exposed cells.

**Supplementary Fig. S3: Comparison of the statistical analysis of single cellular contraction cycles averaged over corresponding cells (Animal 3) compared to all animals combined, performed using the commercial software GraphPad “*Prism*” and MyoCyter v2.0.**

The upper table (**Panel A**) shows the statistical analysis for a single animal (Animal 3) based on contraction cycle parameters averaged per cell, whereas the lower table (**Panel B**) shows the result of analyzing all single cells pooled across all animals (unexposed control vs. H2O2-exposed).

For each parameter (row), the tables report the group sample sizes (number of cells per group), the group means, the Mann-Whitney U statistic, the p-value, and the corresponding significance summary (ns: not significant; *: p < 0.05; **: p < 0.01; ***: p < 0.001; ****: p < 0.0001.). To avoid misunderstandings, the previously used corresponding terms “overall,” “contraction,” and “relaxation” were added after the MyoCyter output labels “PeakTimes,” “Systole,” and “Diastole.”

Applied settings: “*Prism*” (unpaired two-tailed non-parametric Mann-Whitney t-test, alpha= 0.05), MyoCyter v2.0 (Mann-Whitney (two groups), two-sided, Rows (each cell = replicate), Continuity_correction ON; alpha=0.05; correction across parameters: None).

In contrast to **Fig. S2**, here, the single contraction cycles are averaged over the corresponding cells.

**Supplementary Fig. S4: Within-sample heterogeneity of contraction timing parameters in control cardiomyocytes of Animal 3.**

**Panel A** visualizes the variability among individual cells within the same Petri dish with respect to contraction and relaxation times at the four thresholds (Thr10, 20, 50, and 90%; C = contraction, R = relaxation). For this purpose, the t-value of each measured cell is compared pairwise with every other cell from the same experiment and displayed as a heatmap (greater statistical deviation is indicated by a higher color temperature). The black diagonal line from the upper left to the lower right indicates that the statistical difference of a cell compared to itself is naturally zero and simultaneously represents the axis of symmetry of each graph. Axis labels denote cell identities, and tick marks indicate boundaries between recordings/videos.

**Panel B** shows the mean ± standard deviation of the corresponding overall peak time for the four thresholds, along with the distribution of individual measurements shown as dots. **Panel C** shows the same, separated into contraction and relaxation times. **Panel D** depicts the corresponding variability in contraction cycle amplitudes.
